# Supplementary material for: Reduced expression of the v-SNAREs AtVAMP71/AtVAMP7C gene family in Arabidopsis reduces drought tolerance by suppression of abscisic acid-dependent stomatal closure
Source: PubMed Central journal article supplement — J Exp Bot. 2010 Apr 27;61(10):2615–22. doi: 10.1093/jxb/erq099 (PMC2882261; doi:10.1093/jxb/erq099), 2010-04-27

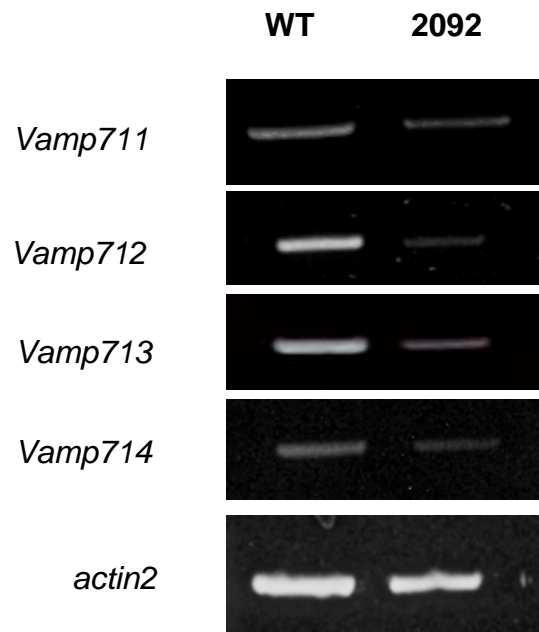

**Supplemental Fig. S1.** Expression of the *AtVAMP711-714* genes in wild type (wt) and antisense 2092 plants

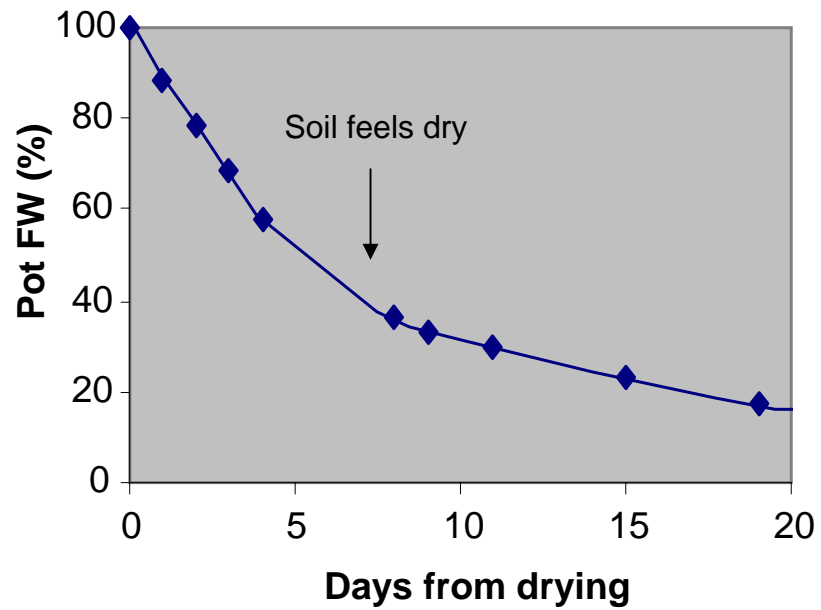

**Supplemental Fig. S2A** Moisture content of pots during drought experiment

2091

wt

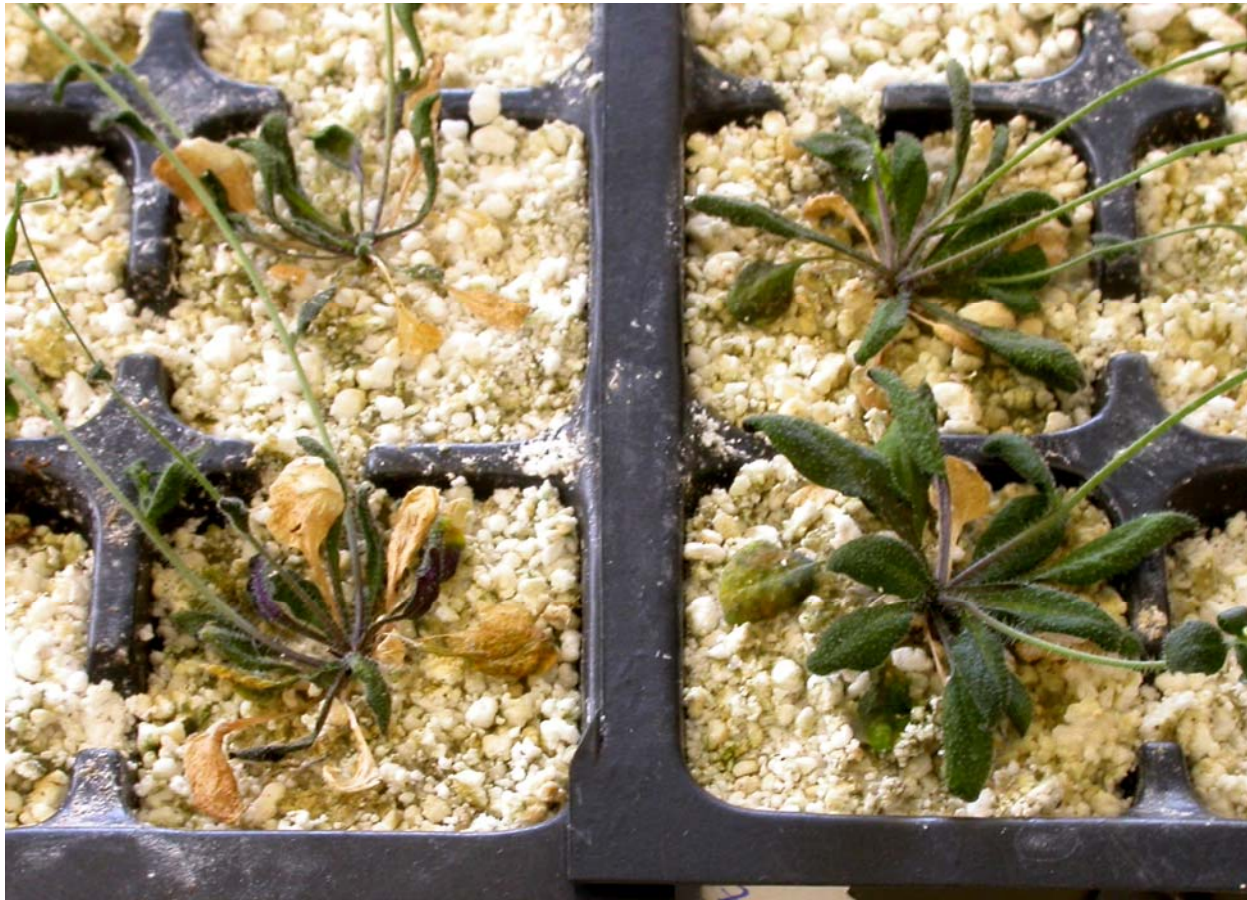

**Supplemental Fig. S2B** Drought in wild-type and antisense plants grown under long day conditions

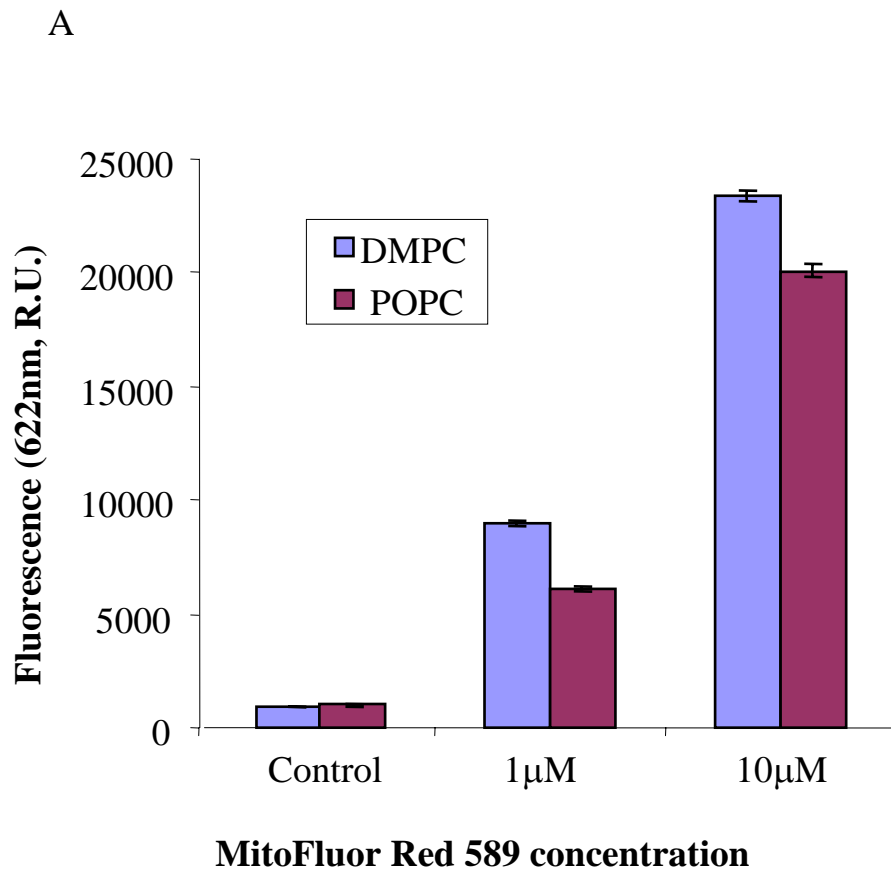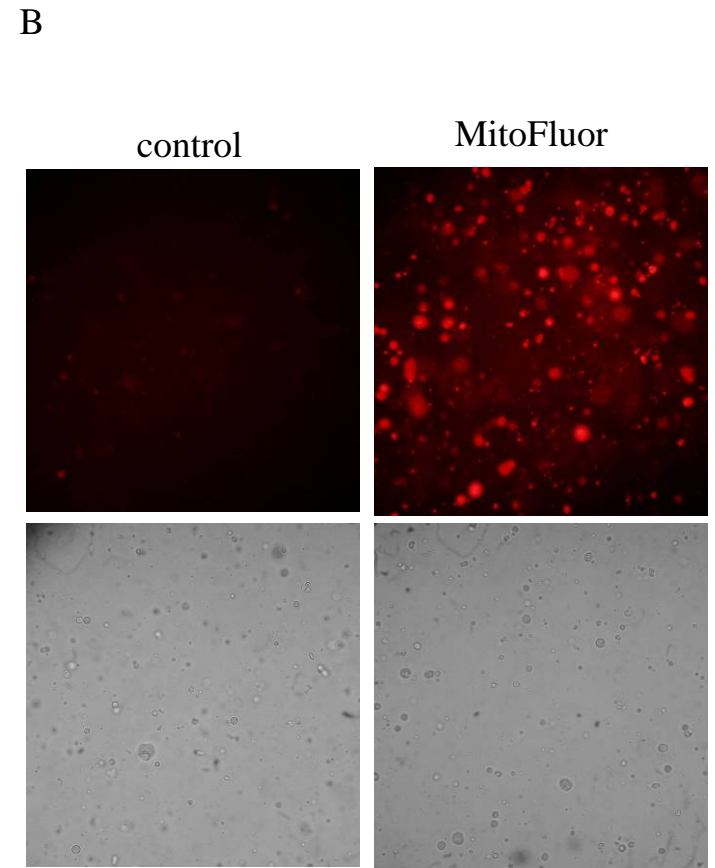

**Supplemental Fig S3 Liposome Membrane staining with MitoFluor Red 589**

**Supplemental Fig S4** Complete Z stack of guard cells presented in fig. 3B

Movie of H2DCFDA stained wild type guard cells, Control

Movie of MitoFluor Red 589 stained wild type guard cells, Control

Movie of Merged green and red filters of wild type guard cells, Control

Movie of H2DCFDA stained 2091 antisense guard cells, Control

Movie of MitoFluor Red 589 stained 2091 antisense guard cells, Control

Movie of Merged green and red filters of 2091 antisense guard cells, Control

Movie of H2DCFDA stained wild type guard cells, ABA

Movie of MitoFluor Red 589 stained wild type guard cells, ABA

Movie of Merged green and red filters of wild type guard cells, ABA

Movie of H2DCFDA stained 2091 antisense guard cells, ABA

Movie of MitoFluor Red 589 stained 2091 antisense guard cells, ABA

Movie of Merged green and red filters of 2091 antisense guard cells, ABA

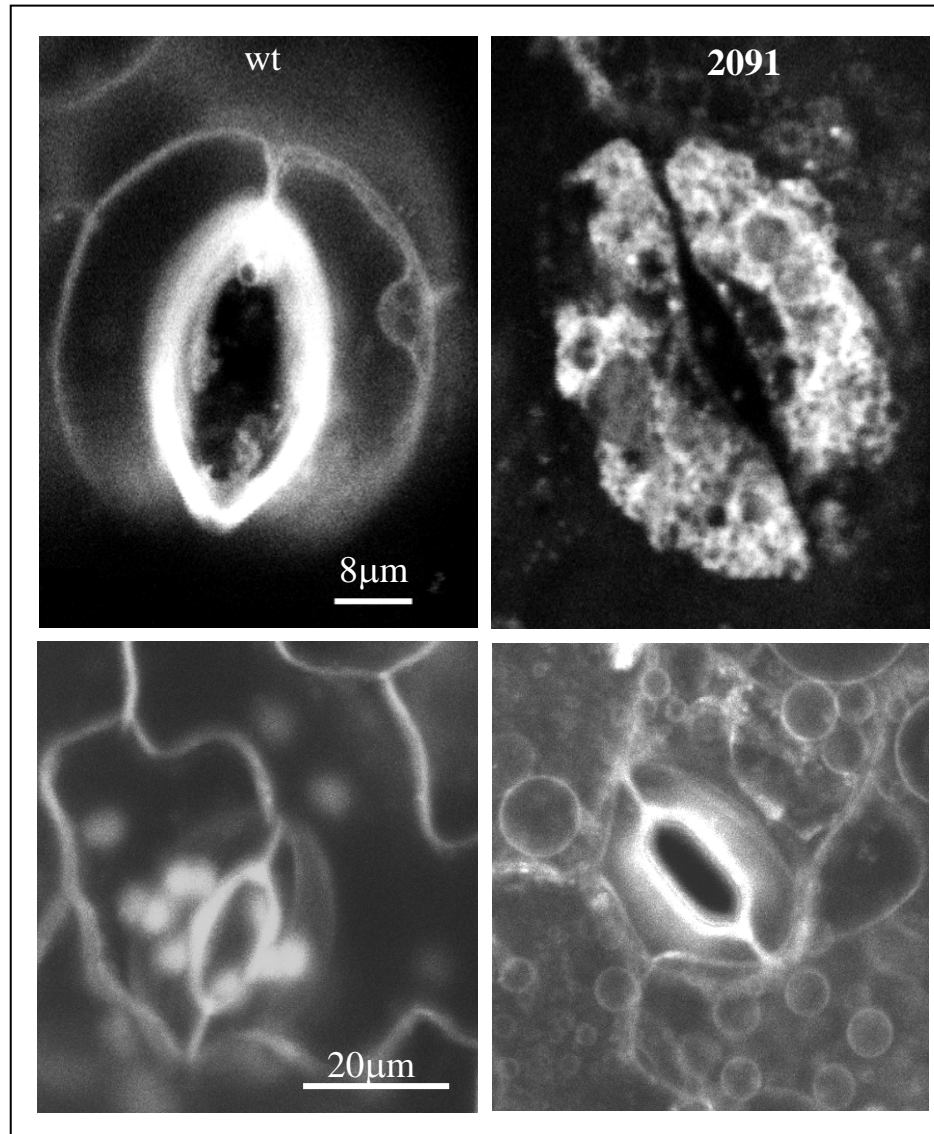

**Supplemental Fig. S5** – Staining of stomata and epidermal pavement cells with FM 4-64.

**Supplemental Fig. S6.** Induction of Intracellular ROS by ABA in mesophyll cells of wild type plants

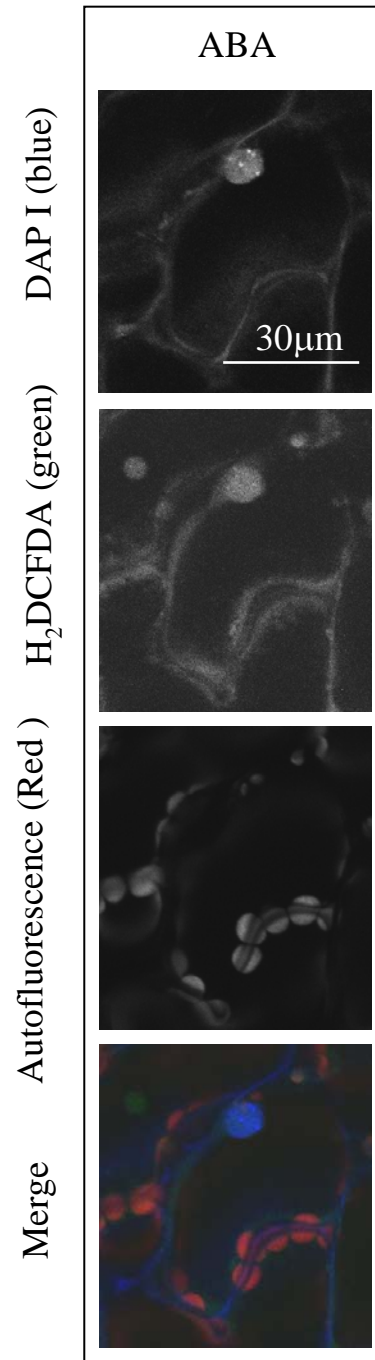

Supplement: erq099_2.pdf [file erq099_2.pdf]
